# Supplementary material for: Isoform-specific disruption of the TP73 gene reveals a critical role for TAp73γ in tumorigenesis via leptin
Source: eLife journal article supplement (doi:10.7554/elife.82115), 2023-08-08

2B

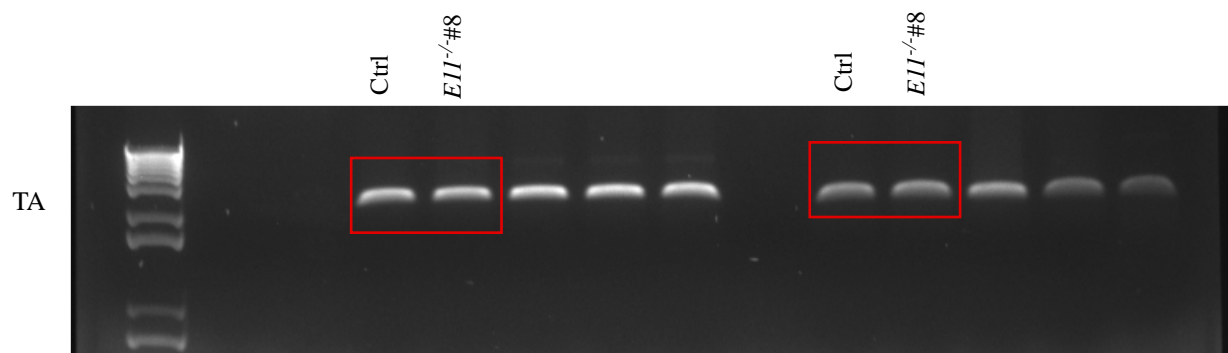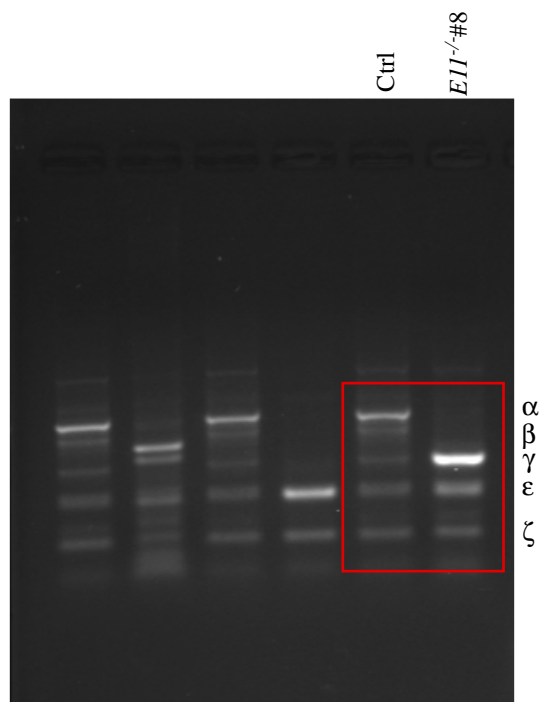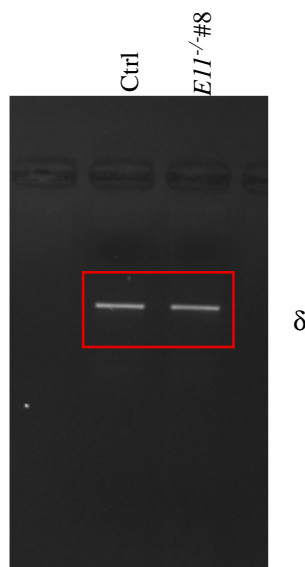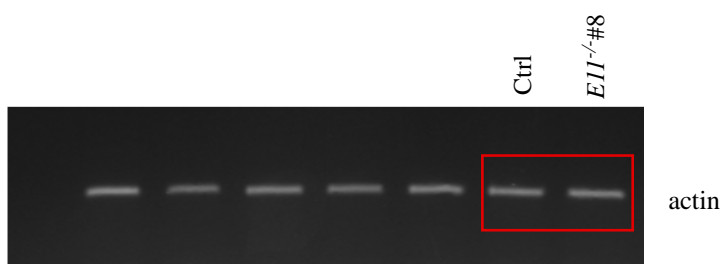

2C

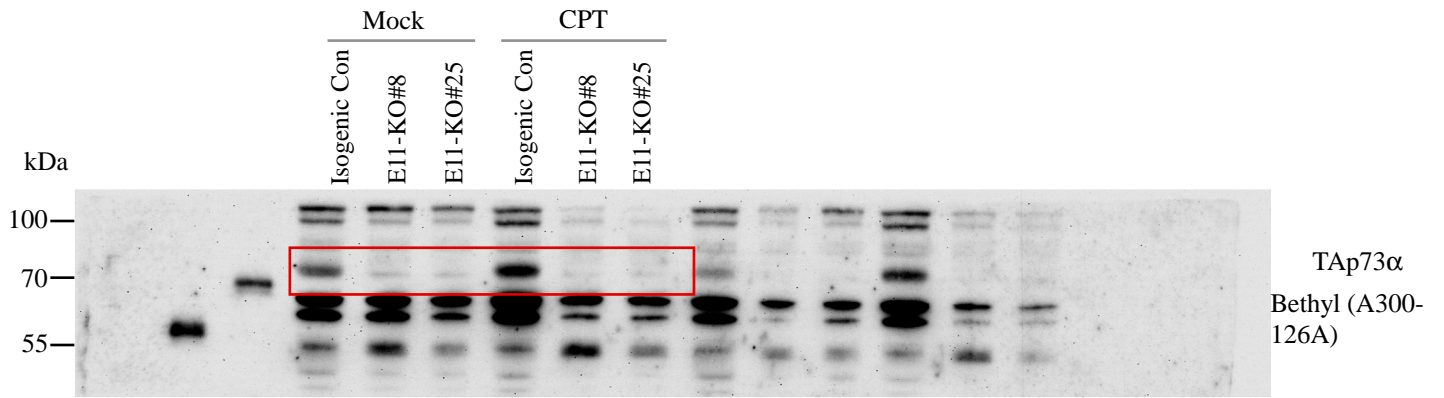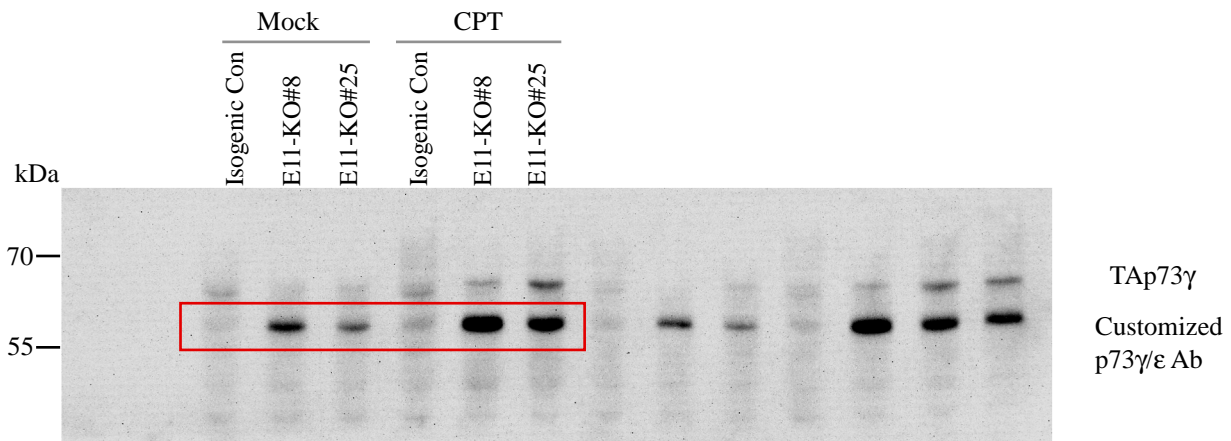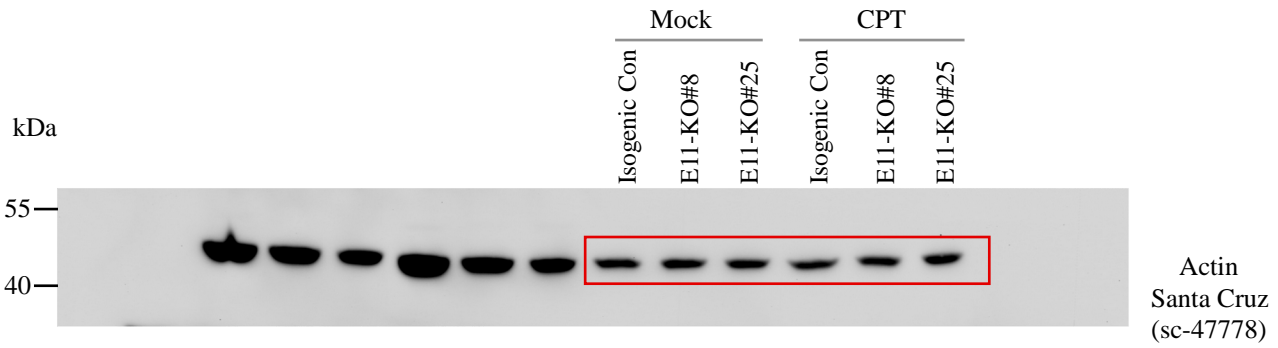

2D

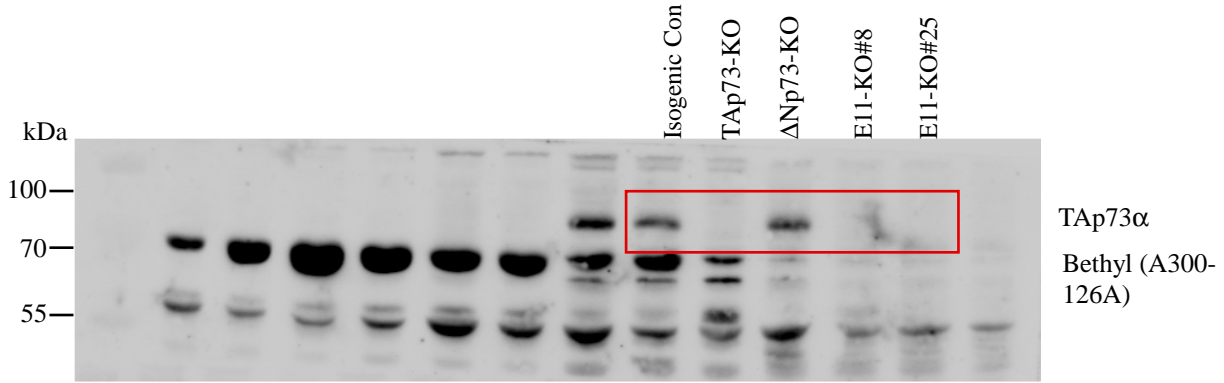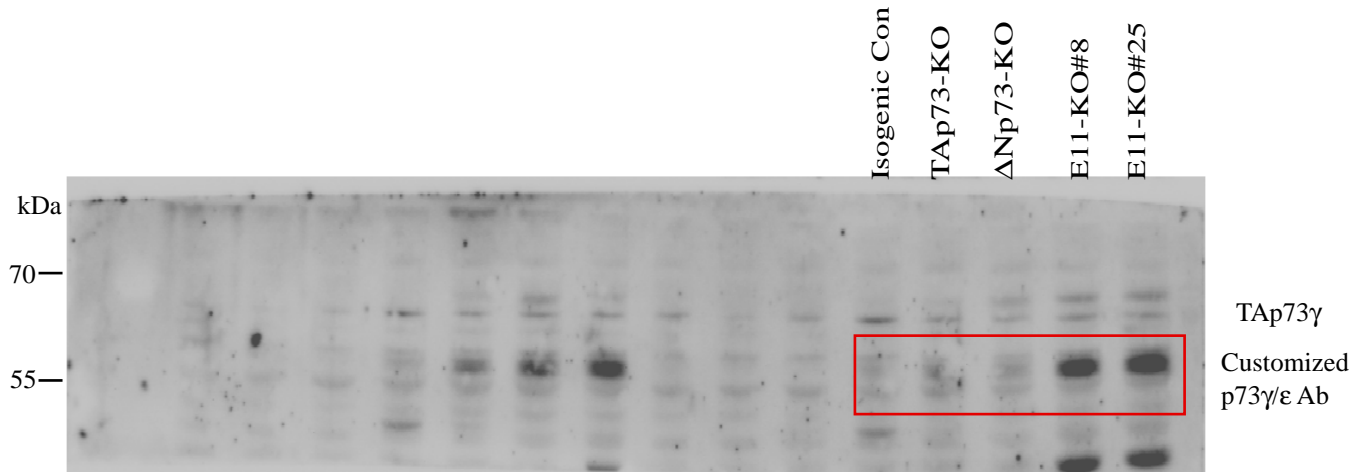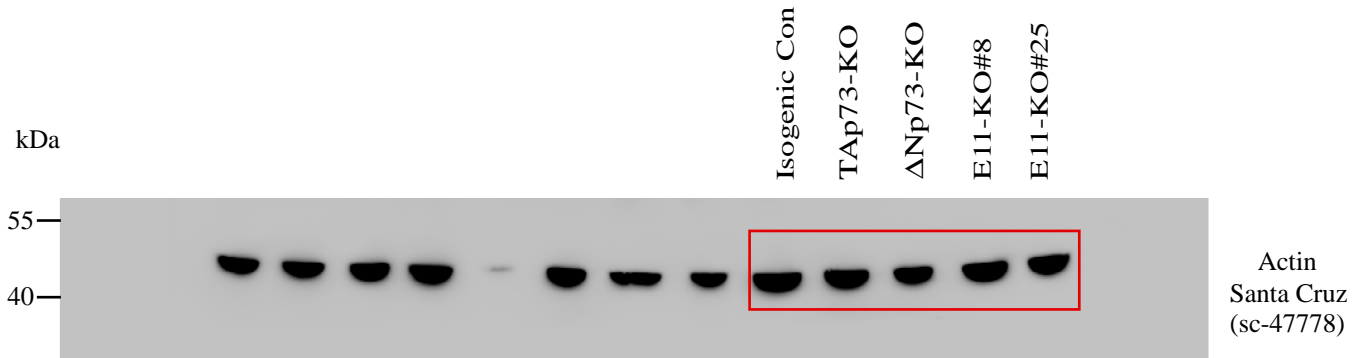

Supplement: fig2-data1 [file elife-82115-fig2-data1-v1.pdf]
