# Supplementary material for: Isoform-specific disruption of the TP73 gene reveals a critical role for TAp73γ in tumorigenesis via leptin
Source: eLife journal article supplement (doi:10.7554/elife.82115), 2023-08-08

6B

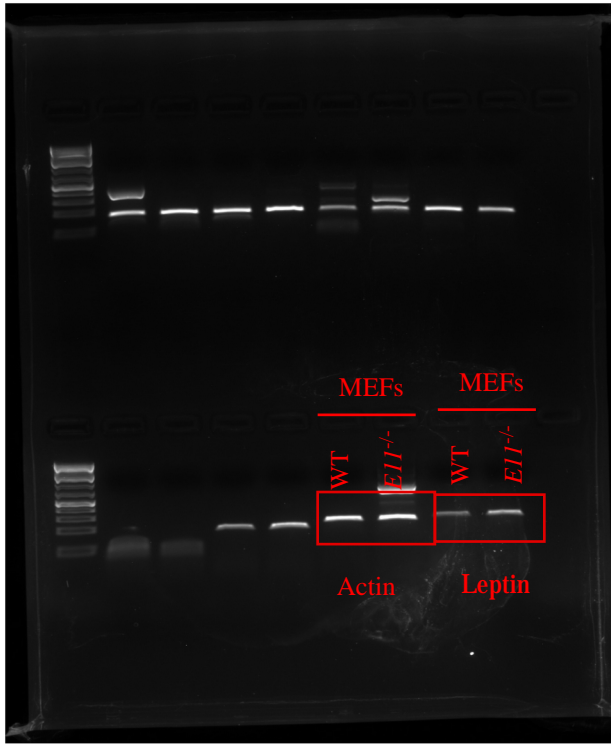

6D

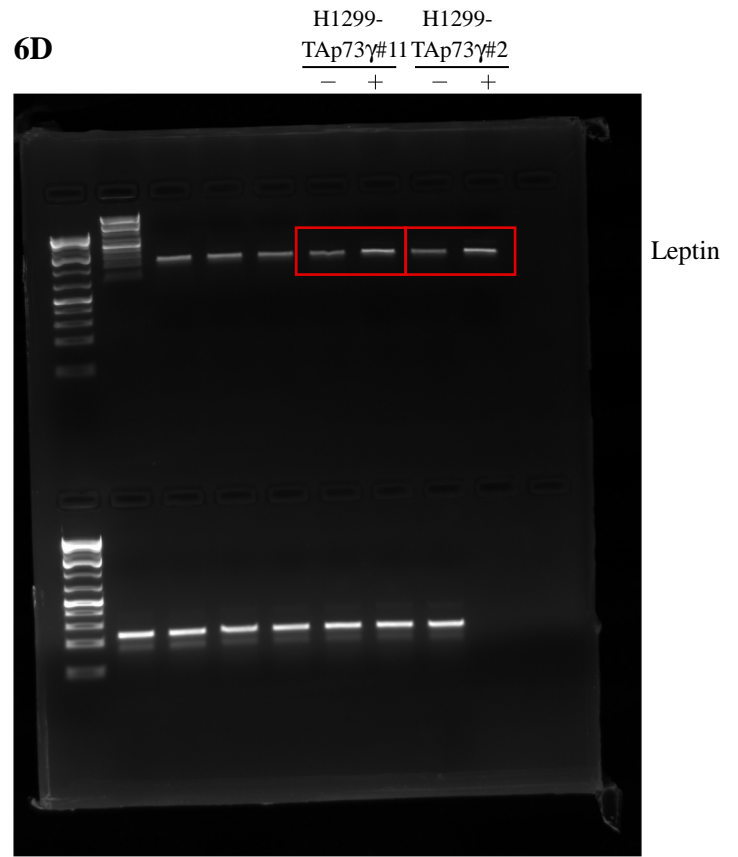

6D

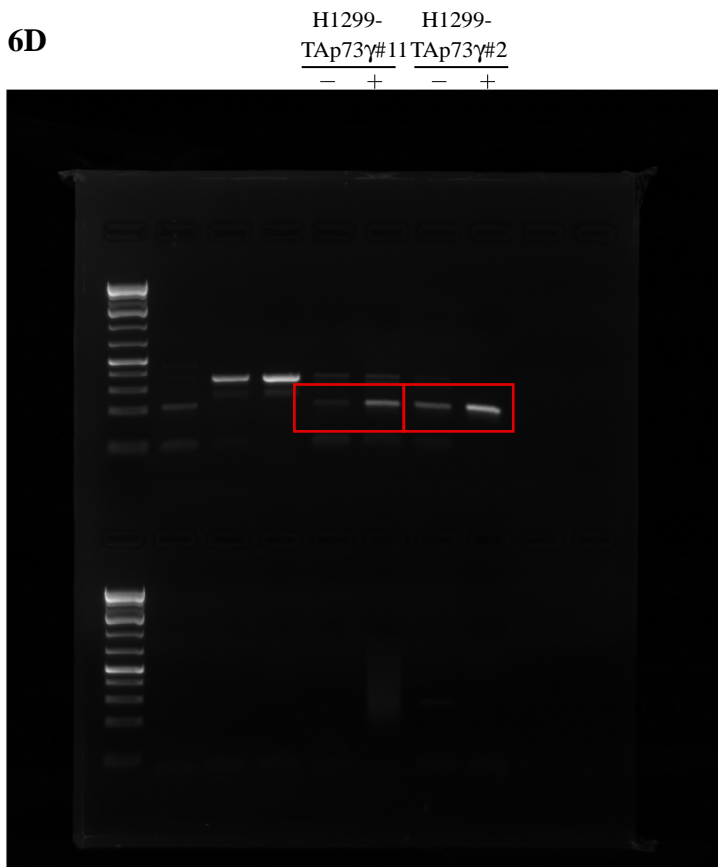

6D

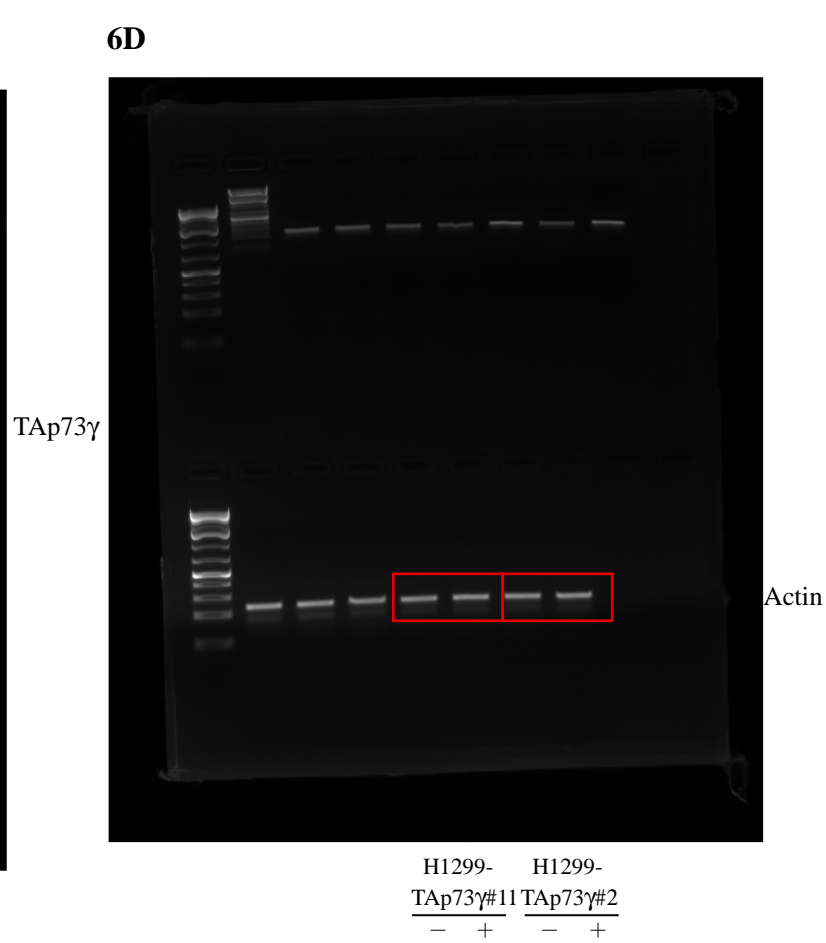

**6E**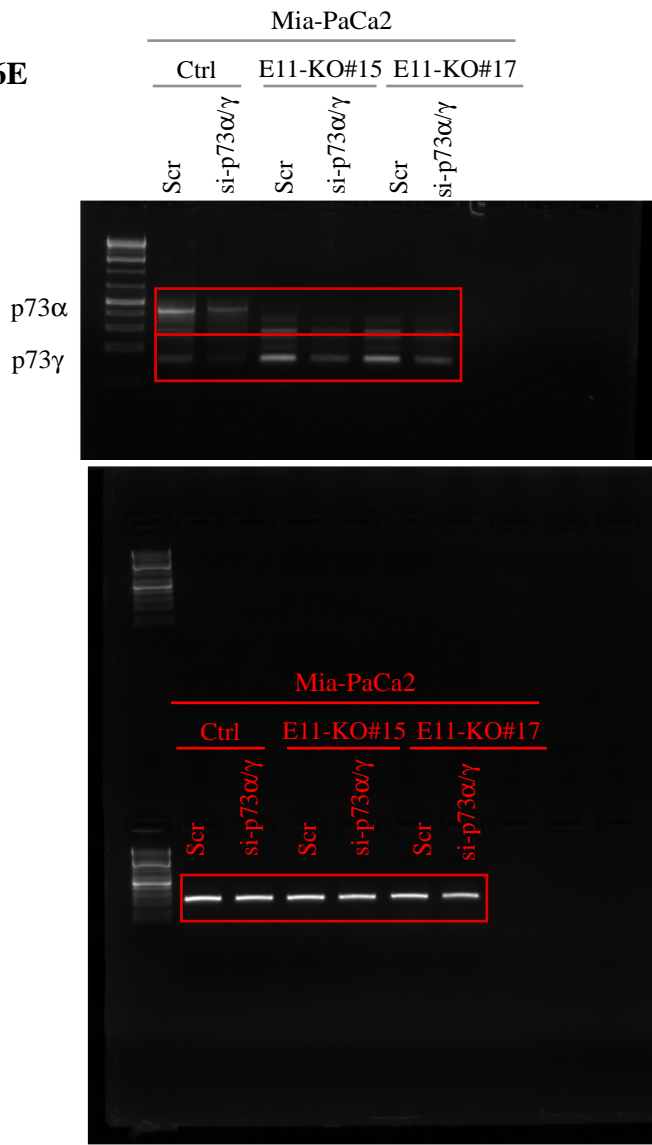

Mia-PaCa2

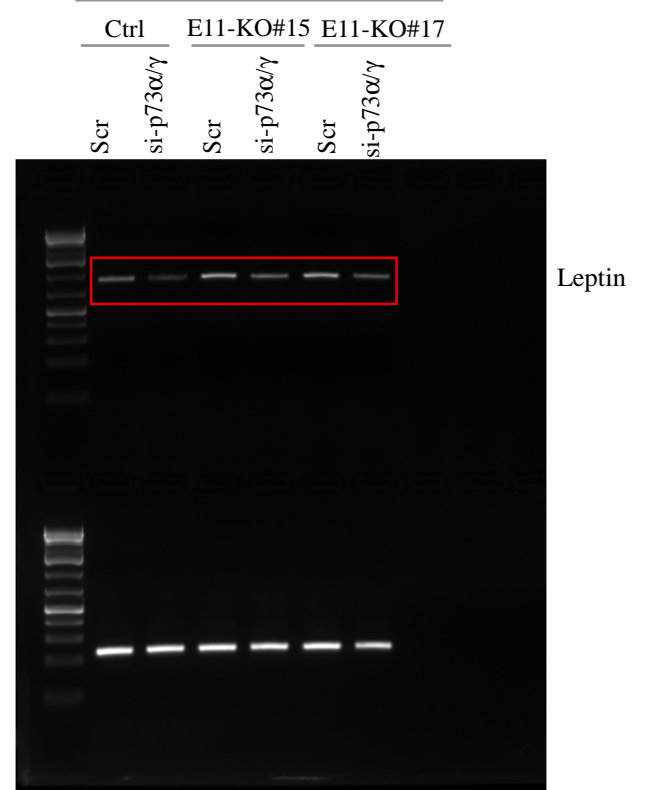**6F**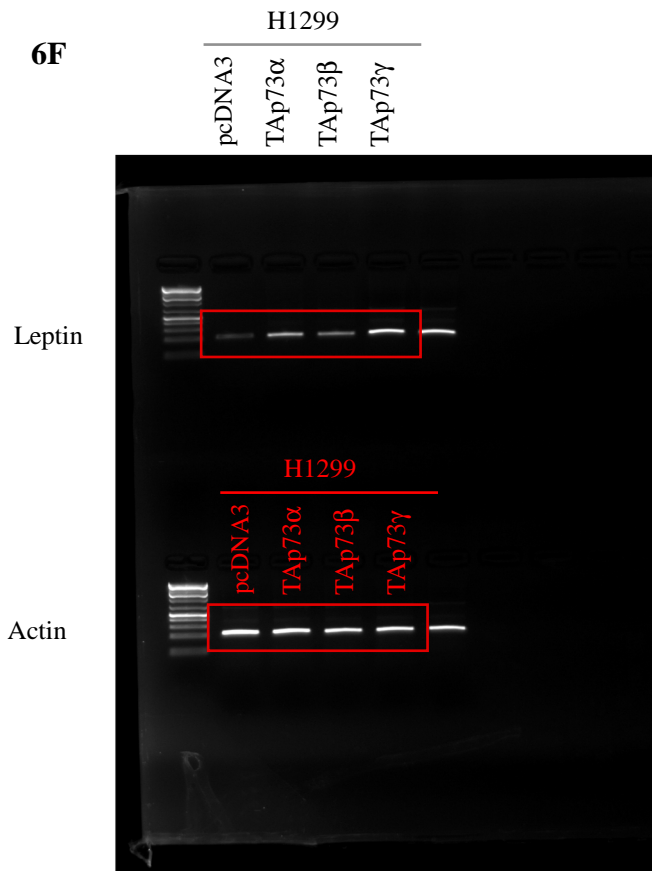

H1299

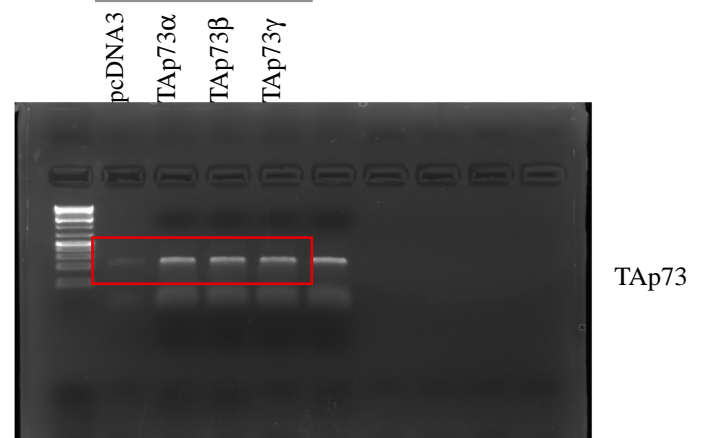

Supplement: fig6-figsupp1-data1 [file elife-82115-fig6-figsupp1-data1-v1.pdf]
