# Supplementary material for: Isoform-specific disruption of the TP73 gene reveals a critical role for TAp73γ in tumorigenesis via leptin
Source: eLife. 2023 Aug 31;12:e82115. doi: 10.7554/eLife.82115 (PMC10471163; doi:10.7554/eLife.82115)
Supplement: Figure 2—figure supplement 1—source data 3. [file elife-82115-fig2-figsupp1-data3.xlsx]

## Sheet: Sheet1
	Relative cell viability	sem
WT	1	0.031
TAp73KO	1.78	0.03
DNp73KO	0.69	0.016
E11KO	2.15	0.027
