# Supplementary material for: Isoform-specific disruption of the TP73 gene reveals a critical role for TAp73γ in tumorigenesis via leptin
Source: eLife. 2023 Aug 31;12:e82115. doi: 10.7554/eLife.82115 (PMC10471163; doi:10.7554/eLife.82115)
Supplement: Figure 3—figure supplement 1—source data 3. [file elife-82115-fig3-figsupp1-data3.xlsx]

## Sheet: Sheet1
H1299	Relative cell viability	SEM
WT-scr	1.3765	0.09
WT-SiLep1	0.800317	0.078
WT-SiLep2	0.84995	0.032
E11KO-scr	2.52141	0.17
E11KO-SiLep1	1.0455	0.14
E11KO-SiLep2	1.05572	0.15
