# Supplementary material for: Isoform-specific disruption of the TP73 gene reveals a critical role for TAp73γ in tumorigenesis via leptin
Source: eLife. 2023 Aug 31;12:e82115. doi: 10.7554/eLife.82115 (PMC10471163; doi:10.7554/eLife.82115)
Supplement: Figure 5—figure supplement 1—source data 3. [file elife-82115-fig5-figsupp1-data3.xlsx]

## Sheet: Fig 5-Fig supplement 1C
Miapaca2	total Triglycerides	sem
WT-scr	1.26843	0.116
WT-Sip73a/g#1	2.11752	0.038
WT-Sip73a/g#2	2.53576	0.17
E11KO-scr	2.90988	0.13
E11KO-Sip73a/g#1	1.18796	0.08
E11KO-Sip73a/g#2	1.11434	0.017

## Sheet: Fig 5-Fig Supplement 1D
	Miapaca2	Total Cholesterol	SEM
	WT-scr	1.27513	0.088
	WT-Sip73a/g#1	2.27595	0.11
	WT-Sip73a/g#2	1.93089	0.204
	E11KO-scr	3.70678	0.048
	E11KO-Sip73a/g#1	1.70274	0.11
	E11KO-Sip73a/g#2	1.50358	0.043
