# Supplementary material for: Isoform-specific disruption of the TP73 gene reveals a critical role for TAp73γ in tumorigenesis via leptin
Source: eLife. 2023 Aug 31;12:e82115. doi: 10.7554/eLife.82115 (PMC10471163; doi:10.7554/eLife.82115)
Supplement: Figure 5—source data 3. [file elife-82115-fig5-data3.xlsx]

## Sheet: Fig 5B
		Fat mass	SEM
male	WT	0.5	0.06
male	E11+/-	2.18	0.2

## Sheet: Fig 5C
		Fat mass	SEM
female	WT	0.37	0.09
female	E11+/-	2.32	0.25

## Sheet: Fig 5F
		Cholesterol	SEM
Male	WT	12.385	0.179
Male	p73+/-	14.613	0.415
Male	E11+/-	20.704	0.872

## Sheet: Fig 5H
			Weight	SEM
20 Wks	male	WT	24.3	0.33
	male	E11+/-	28.67	0.67
32 Wks	male	WT	25.67	0.33
	male	E11+/-	31.33	0.67

## Sheet: Fig 5I
			Weight	SEM
20 Wks	female	WT	18.67	0.58
	female	E11+/-	23	0.67
32 Wks	female	WT	21	0.58
	female	E11+/-	28.33	0.88

## Sheet: Fig 5J
			Cholesterol	SEM
	MALE	WT	14.5464	0.268
		E11+/-	21.3209	0.299
	Female	WT	12.8774	0.293055
		E11+/-	19.479	0.42

## Sheet: Fig 5K
					Triglycerides	SEM
			MALE	WT	3.385	0.571
				E11+/-	8.77923	0.758
			Female	WT	3.95551	0.431
				E11+/-	9.82097	0.431

## Sheet: Fig 5M
						H1299	Cholesterol	SEM
						Iso Ctrl-scr	1.38056	0.122
						Iso ctrl-Sip73a/g#1	2.26976	0.113
						Iso Ctrl-Sip73a/g#2	2.14694	0.166
						E11KO-scr	3.70658	0.086
						E11KO-Sip73a/g#1	1.70594	0.133
						E11KO-Sip73a/g#2	1.54375	0.047

## Sheet: Fig 5N
		H1299	total	sem
		Iso Ctrl-scr	1.08556	0.058
		Iso ctrl-Sip73a/g#1	1.91757	0.143
		Iso Ctrl-Sip73a/g#2	2.06277	0.17
		E11KO-scr	3.09575	0.13
		E11KO-Sip73a/g#1	0.976888	0.082
		E11KO-Sip73a/g#2	1.17914	0.116

## Sheet: Fig 5G
Male	WT	3.364	0.571
Male	p73+/-	5.57	0.431
Male	E11+/-	11.26	0.758
