# Supplementary material for: Isoform-specific disruption of the TP73 gene reveals a critical role for TAp73γ in tumorigenesis via leptin
Source: eLife. 2023 Aug 31;12:e82115. doi: 10.7554/eLife.82115 (PMC10471163; doi:10.7554/eLife.82115)
Supplement: Figure 6—source data 3. [file elife-82115-fig6-data3.xlsx]

## Sheet: Fig 6B
	serum Leptin	sem
WT	4.77	0.223
p73+/-	6.41	0.374
E11+/-	11.41	0.615

## Sheet: FIG 6C
	fat leptin	se
WT	3.77	0.11
p73+/-	5.51	0.164
E11+/-	9.37	0.289

## Sheet: Fig 6D
						Serum Leptin	SEM
				M	WT	1.225	0.37
				M	E11+/-	4.625	0.770711
				F	WT	4.768	0.766667
				F	E11+/-	9.935	0.66

## Sheet: Fig 6E
		Serum leptin	SEM
male	WT	5.24	0.242
male	E11+/-	13.66	0.26
female	WT	10.65	0.896
female	E11+/-	21.81	0.774

## Sheet: FIG 6L
	Lep	sem			p21	SEM
Ctr input	1	0.08		Ctr input	1	0.08
Ctr IGG	0.13	0.02		Ctr IGG	0.01	0.005
Ctr IP	0.32	0.07		Ctr IP	0.25	0.07
p73g input	1	0.04		p73g input	1	0.06
p73g IGG	0.193548	0.03		p73g IGG	0.03	0.01
p73g IP	0.967742	0.05		p73g IP	1.8	0.05

## Sheet: FIG 6M
	Relative luciferase activity	sem
pc3+WT lep	1	0.105
p73a+WT lep	4.3	0.566
p73b+WT lep	4.05	0.041
p73g+WT lep	8.442	1.021
pc3+mut lep	1	0.121
p73a+mut lep	2.254	0.288
p73b+mut lep	1.466	0.241
p73g+mut lep	2.14	0.2
