# Supplementary material for: Isoform-specific disruption of the TP73 gene reveals a critical role for TAp73γ in tumorigenesis via leptin
Source: eLife. 2023 Aug 31;12:e82115. doi: 10.7554/eLife.82115 (PMC10471163; doi:10.7554/eLife.82115)
Supplement: Figure 8—source data 3. [file elife-82115-fig8-data3.xlsx]

## Sheet: Fig. 8H
H1299 E11KO	scr	sip73g	silep
Tumor weight	1.35	0.19	0.28
SEM	0.132	0.037	0.05

## Sheet: Fig 8C
	WT	E11KO
Tumor weight	0.23	0.87
SEM	0.052	0.164

## Sheet: Fig 8A
		Day	1	3	5	7	9	11	13	15	17
		WT	111.14	125.07	136.43	197.43	240.71	266.86	335.07	382.5	426.29
		Sem	16.27	16.93	18.29	10.59	36.21	49.63	34.37	37.58	50.03
		E11KO	105.71	121.71	148.79	245.07	421	496.93	657.64	794.57	1091.14
		SEM	15.22	18.82	9.58	24.89	52	54.06	69.86	66.08	100.29

## Sheet: Sheet4
		1	3	5	7	9	11	13	15	17
	scr	91.67	104.42	113.67	165	288.59	455.67	705.83	829	1449.1
	sip73g	99.17	104.25	121.83	153.33	200.17	257.17	315.67	364.5	386.33
	silep	97.42	110	127.67	187.33	261.33	337.5	364.5	458.33	525
