# Supplementary figures and images for: Isoform-specific disruption of the TP73 gene reveals a critical role for TAp73γ in tumorigenesis via leptin
Source: eLife journal article supplement (doi:10.7554/elife.82115), 2023-08-08

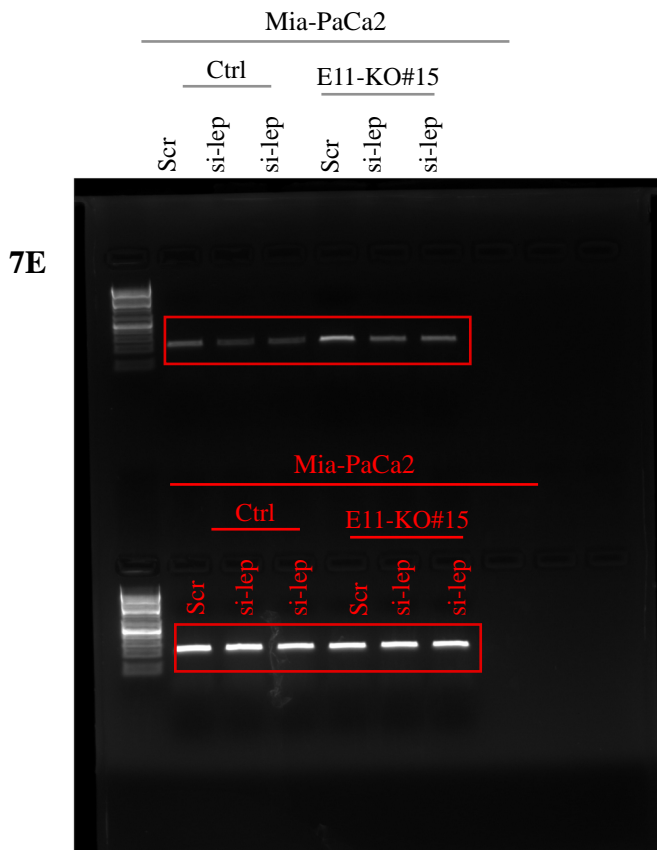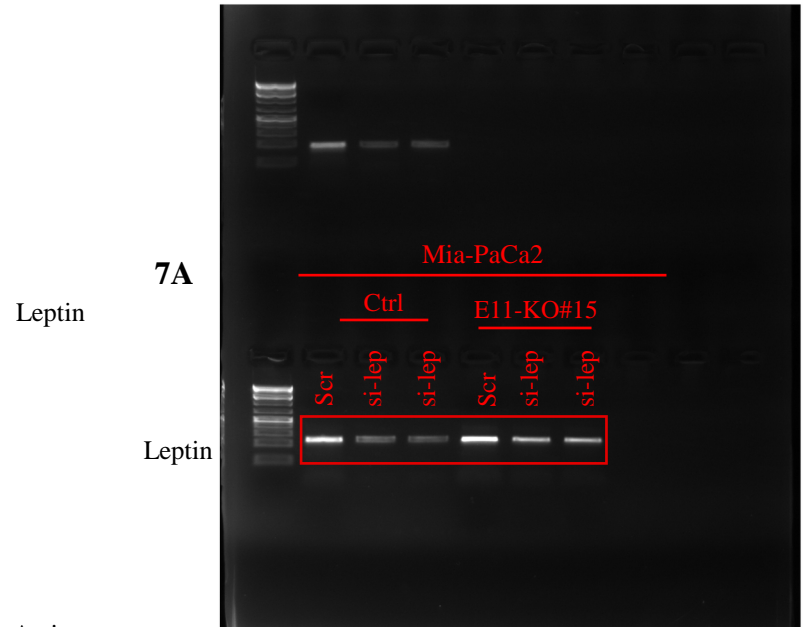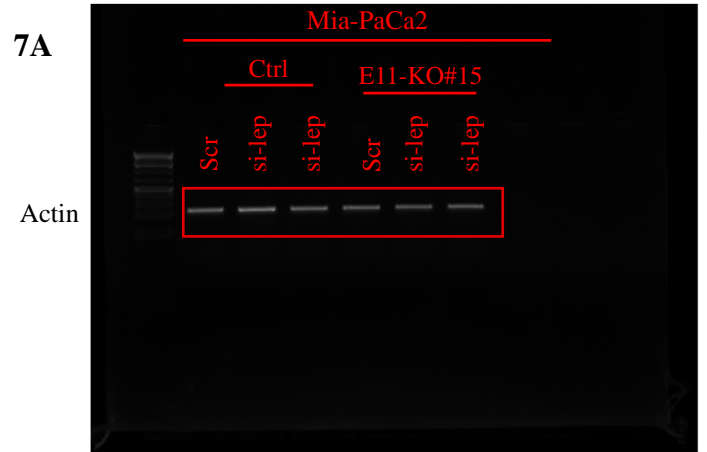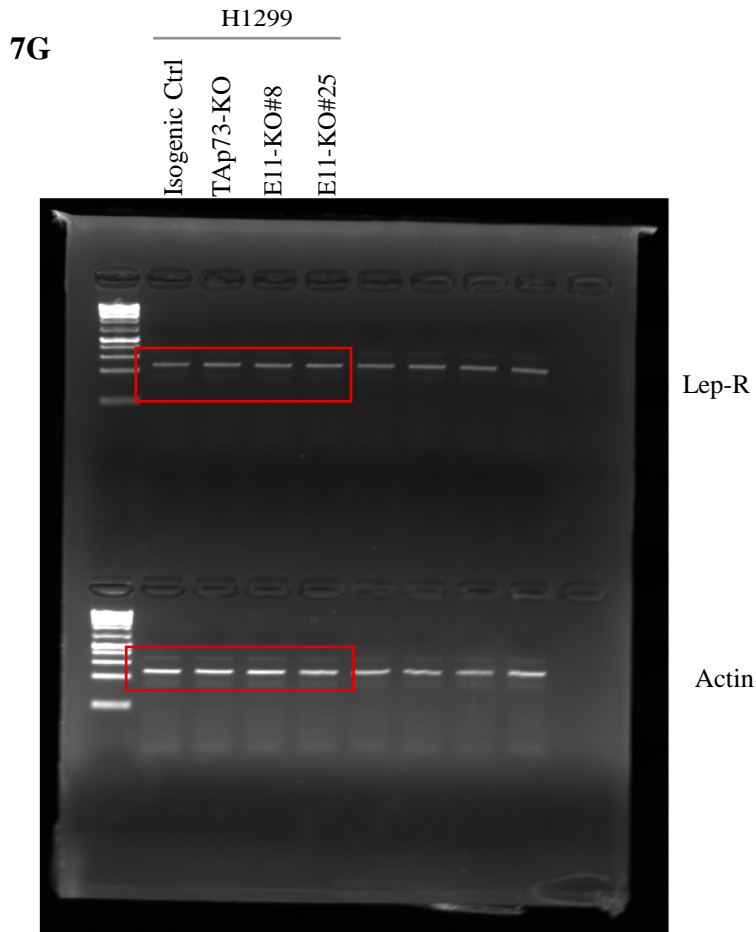

Supplement: fig7-figsupp1-data1 [file elife-82115-fig7-figsupp1-data1-v1.pdf]
